# Supplementary material for: Genomes for Kids: The Scope of Pathogenic Mutations in Pediatric Cancer Revealed by Comprehensive DNA and RNA Sequencing
Source: PubMed Central journal article supplement — Cancer Discov. 2021 Jul 23;11(12):3008–27. doi: 10.1158/2159-8290.CD-20-1631 (PMC8783930; doi:10.1158/2159-8290.cd-20-1631), 2021-07-23
Supplement: NIHMS1728529-supplement-5.pdf [file NIHMS1728529-supplement-5.pdf]

Figure S4.

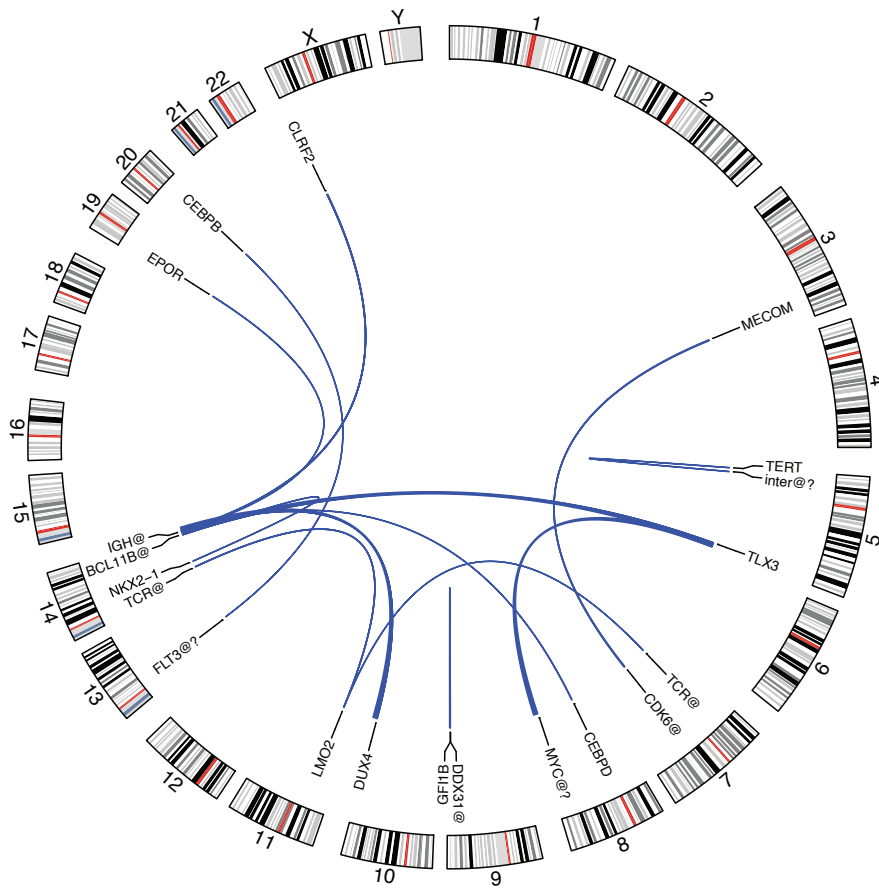

**Figure S4.** Enhancer hijacks. Circos plot showing enhancer hijacks (blue links). Enhancer loci are indicated by an "@" suffix. For example, IGH@-CRLF2 indicates that the immunoglobulin heavy chain enhancer drives high expression of CRLF2.
